# Supplementary material for: Genetic Dissection of Seasonal Changes in a Greening Plant Based on Time-Series Multispectral Imaging
Source: MDPI journal article supplement (doi:10.3390/plants12203597), 2023-10-17
Supplement: s1 [file s1]

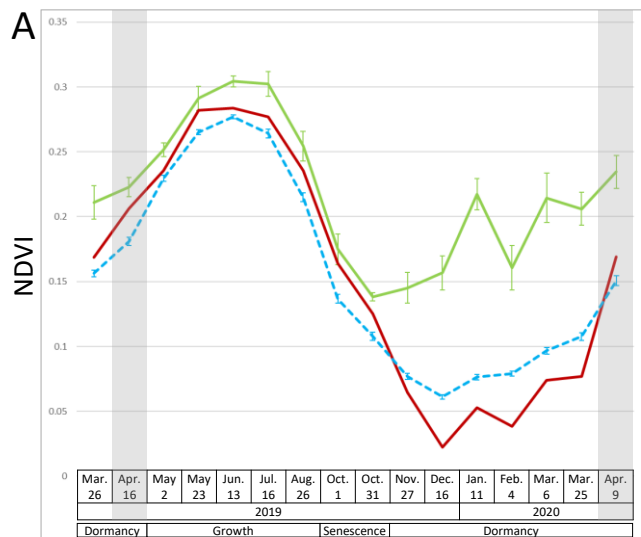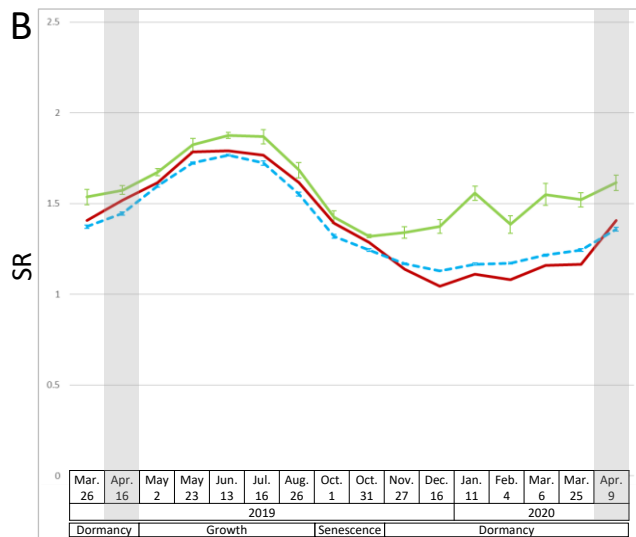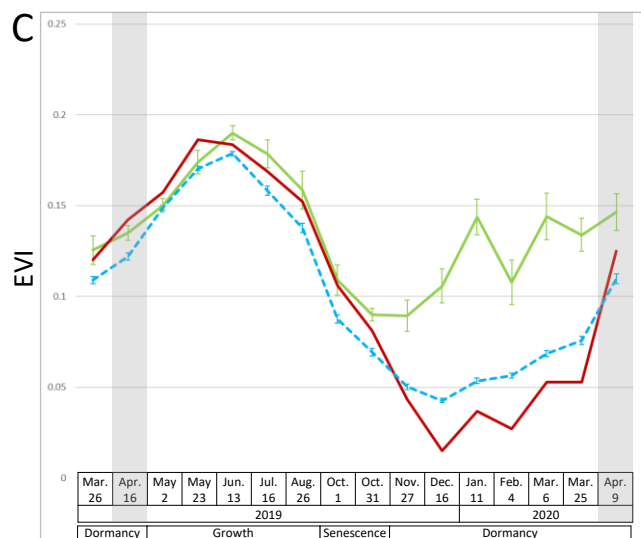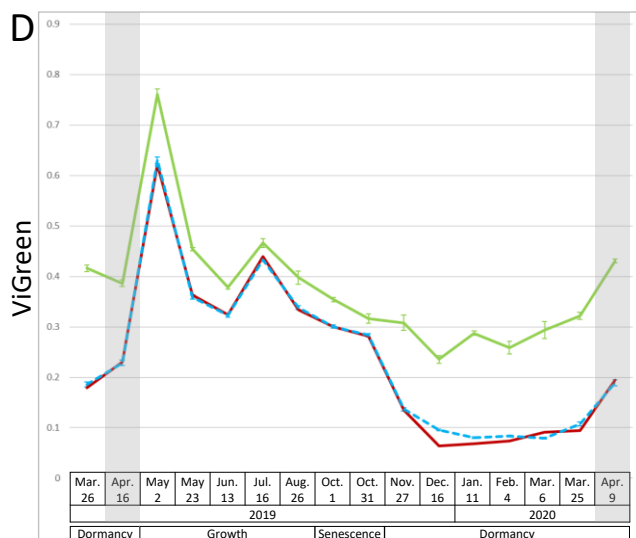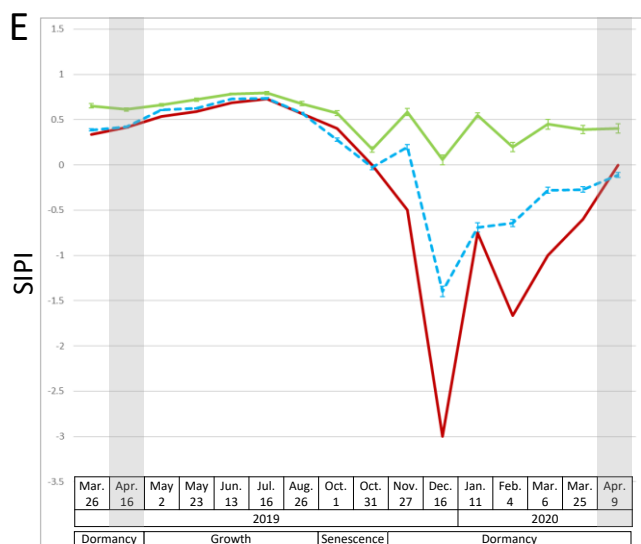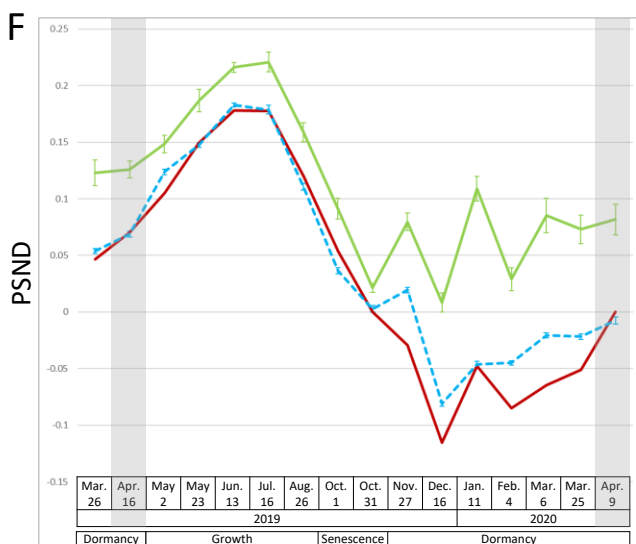

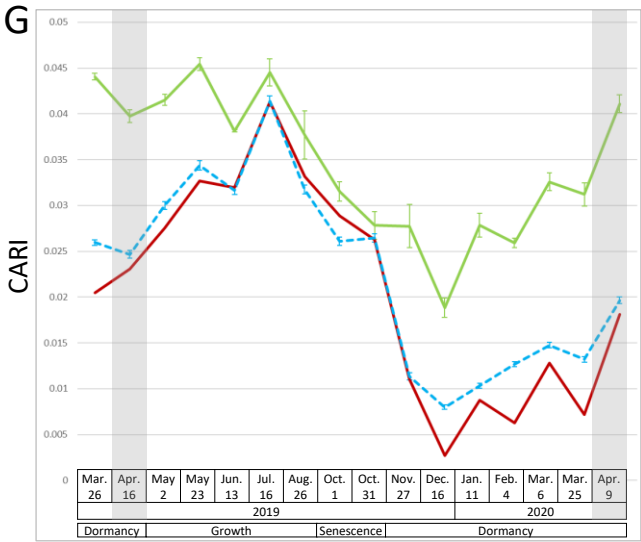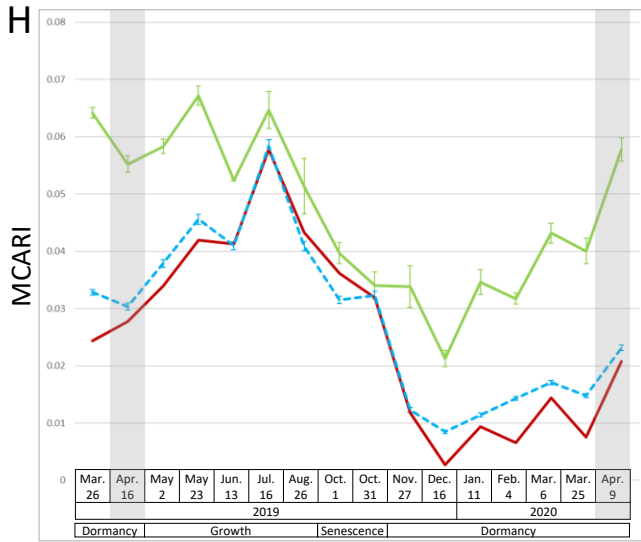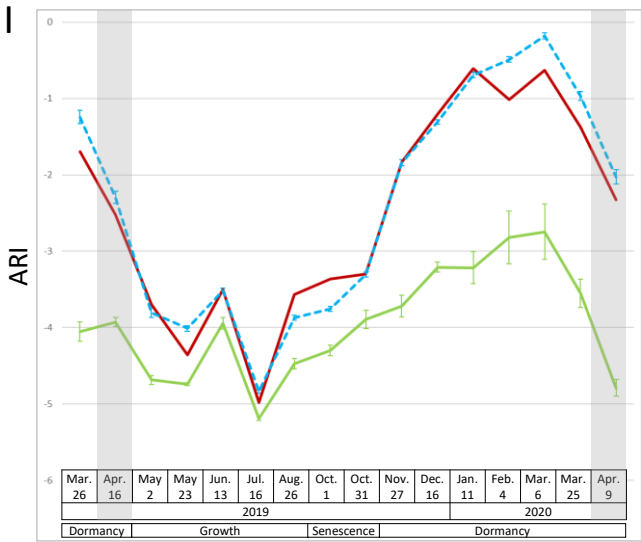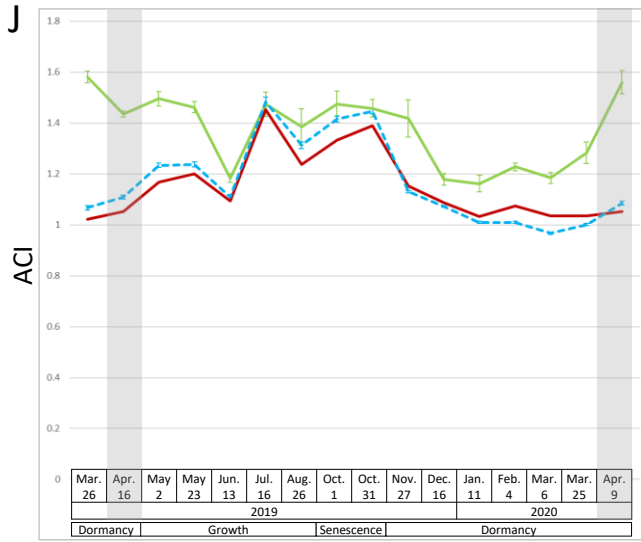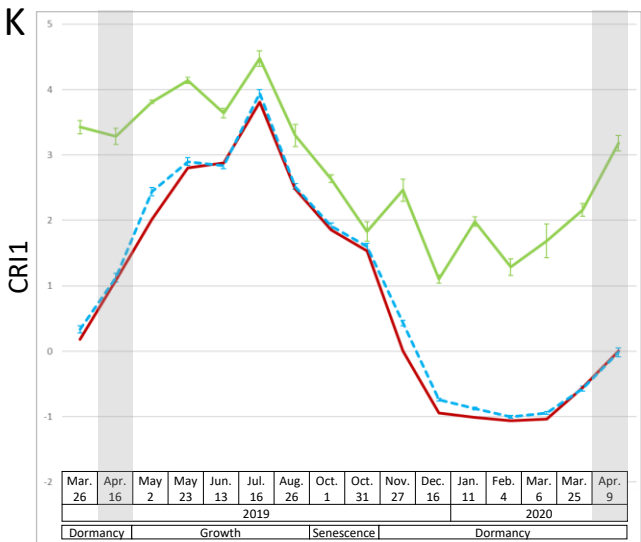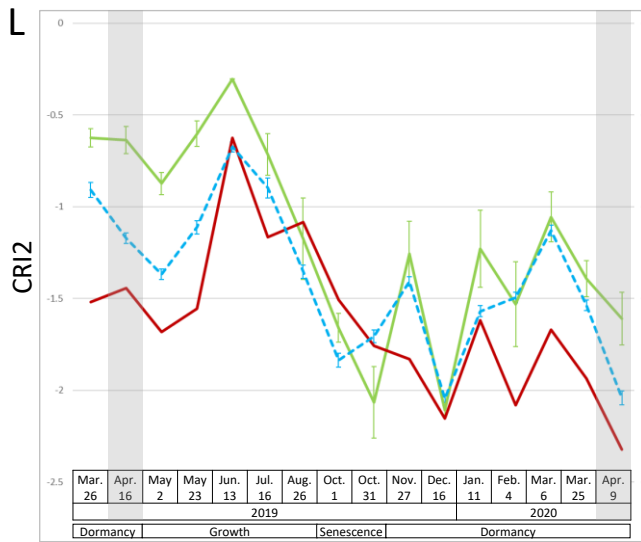

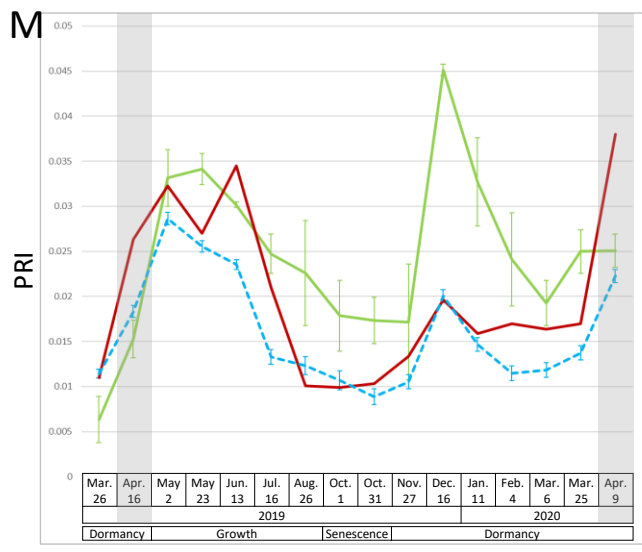

**Figure S1.** Monthly changes in vegetation indices. Indices are indicated in vertical axis labels. Green line, mean of  $P_1$  ( $n = 4$ ); red line,  $P_2$  ( $n = 1$ ); blue dashed line, mean of  $F_1$  ( $n = 94$ ). Error bars, standard errors. Gray shading, the dates used in [20].
