# Supplementary material for: Genetic Dissection of Seasonal Changes in a Greening Plant Based on Time-Series Multispectral Imaging
Source: MDPI journal article supplement (doi:10.3390/plants12203597), 2023-10-17
Supplement: s1 [file s1]

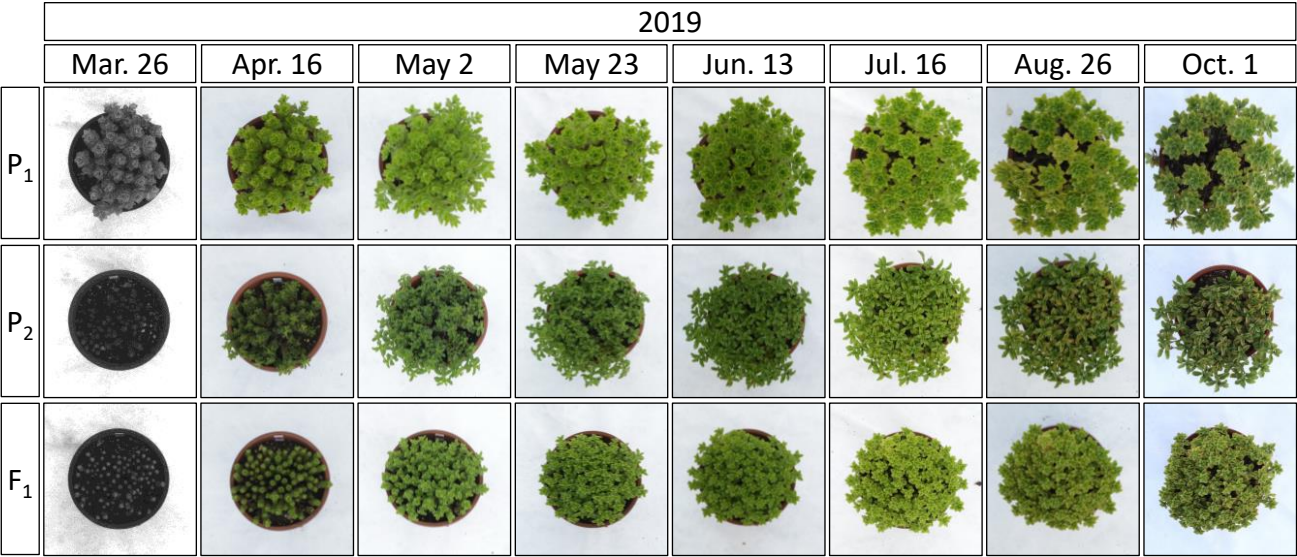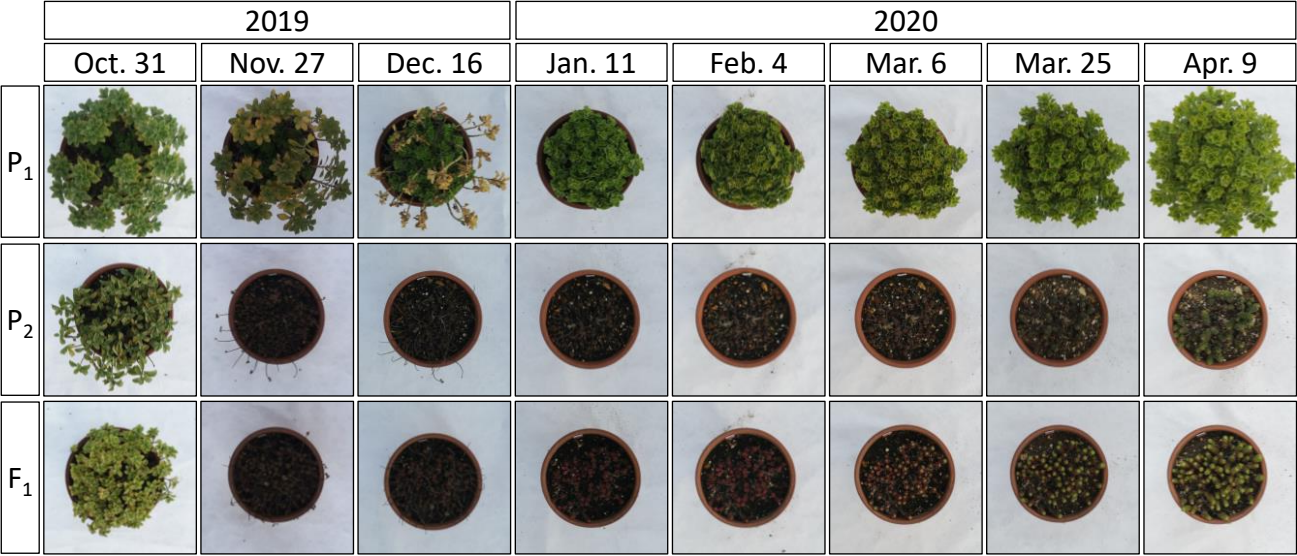

**Figure S3.**  
 Seasonal changes in plant appearance.  
 The photos (RGB images) show one of the four P<sub>1</sub> individuals, P<sub>2</sub>, and one of the F<sub>1</sub> individuals. For March 26, 2019, a monochrome image with a reflection value of 550 nm was available.
